# Supplementary material
Source: HighWire-hosted journal article supplement (https://bmjopen.bmj.com/content/8/6/e020926)
Supplement: inline-supplementary-material-1 [file inline-supplementary-material-1.pdf]

## Supplementary data

**Table S1 Inclusion medical codes for type 2 diabetes**

|     | Medical code | Read term                                                    |
|-----|--------------|--------------------------------------------------------------|
| 1.  | 506          | Non-insulin dependent diabetes mellitus                      |
| 2.  | 758          | Type 2 diabetes mellitus                                     |
| 3.  | 1407         | Insulin treated Type 2 diabetes mellitus                     |
| 4.  | 4513         | Non-insulin dependent diabetes mellitus                      |
| 5.  | 5884         | NIDDM - Non-insulin dependent diabetes mellitus              |
| 6.  | 8403         | Non-insulin dependent diabetes mellitus - poor control       |
| 7.  | 12640        | Type 2 diabetes mellitus with nephropathy                    |
| 8.  | 12736        | Type 2 diabetes mellitus with gangrene                       |
| 9.  | 17262        | Non-insulin-dependent diabetes mellitus with retinopathy     |
| 10. | 17859        | Type 2 diabetes mellitus                                     |
| 11. | 18143        | Type II diabetes mellitus with arthropathy                   |
| 12. | 18209        | Type 2 diabetes mellitus with renal complications            |
| 13. | 18219        | Type II diabetes mellitus                                    |
| 14. | 18264        | Insulin treated Type II diabetes mellitus                    |
| 15. | 18278        | Insulin treated Type 2 diabetes mellitus                     |
| 16. | 18390        | Type 2 diabetes mellitus with persistent microalbuminuria    |
| 17. | 18425        | Type 2 diabetes mellitus with polyneuropathy                 |
| 18. | 18496        | Type 2 diabetes mellitus with retinopathy                    |
| 19. | 18777        | Type 2 diabetes mellitus with renal complications            |
| 20. | 22884        | Type II diabetes mellitus                                    |
| 21. | 24458        | Type II diabetes mellitus - poor control                     |
| 22. | 24693        | Non-insulin dependent diabetes mellitus with arthropathy     |
| 23. | 24836        | Type 2 diabetes mellitus with nephropathy                    |
| 24. | 25041        | Dietary advice for type II diabetes                          |
| 25. | 25591        | Type 2 diabetes mellitus with exudative maculopathy          |
| 26. | 25627        | Type 2 diabetes mellitus - poor control                      |
| 27. | 26054        | Type 2 diabetes mellitus with persistent proteinuria         |
| 28. | 29979        | Non-insulin-dependent diabetes mellitus without complication |
| 29. | 32627        | Type 2 diabetes mellitus with ketoacidosis                   |
| 30. | 34268        | Type 2 diabetes mellitus with neurological complications     |
| 31. | 34450        | Hyperosmolar non-ketotic state in type 2 diabetes mellitus   |
| 32. | 34912        | Non-insulin dependent diabetes mellitus with ulcer           |
| 33. | 35385        | Type 2 diabetes mellitus with neuropathic arthropathy        |
| 34. | 36633        | Hyperosmolar non-ketotic state in type 2 diabetes mellitus   |
| 35. | 36695        | Diabetes mellitus autosomal dominant type 2                  |
| 36. | 37648        | Insulin treated non-insulin dependent diabetes mellitus      |
| 37. | 37806        | Type 2 diabetes mellitus with peripheral angiopathy          |
| 38. | 40401        | Non-insulin dependent diabetes mellitus with gangrene        |
| 39. | 42762        | Type 2 diabetes mellitus with retinopathy                    |
| 40. | 43227        | Type II diabetes mellitus with multiple complications        |
| 41. | 43785        | Non-insulin dependent diabetes mellitus with hypoglyca coma  |
| 42. | 44779        | Type 2 diabetes mellitus with diabetic cataract              |
| 43. | 44982        | Type 2 diabetes mellitus with diabetic cataract              |
| 44. | 45467        | Non-insulin dependent diabetes mellitus with polyneuropathy  |
| 45. | 45913        | Type 2 diabetes mellitus - poor control                      |
| 46. | 45919        | Type 2 diabetes mellitus with neurological complications     |

|     | Medical code | Read term                                                   |
|-----|--------------|-------------------------------------------------------------|
| 47. | 46150        | Type 2 diabetes mellitus with gangrene                      |
| 48. | 46917        | Type 2 diabetes mellitus with hypoglycaemic coma            |
| 49. | 47315        | Type II diabetes mellitus - poor control                    |
| 50. | 47321        | Type 2 diabetes mellitus with ophthalmic complications      |
| 51. | 47409        | Type II diabetes mellitus with polyneuropathy               |
| 52. | 47816        | Type II diabetes mellitus with neuropathic arthropathy      |
| 53. | 47954        | Type 2 diabetes mellitus without complication               |
| 54. | 48192        | Type II diabetes mellitus with diabetic cataract            |
| 55. | 49074        | Type 2 diabetes mellitus with ulcer                         |
| 56. | 49655        | Type II diabetes mellitus with retinopathy                  |
| 57. | 49869        | Type 2 diabetes mellitus with arthropathy                   |
| 58. | 50225        | Type II diabetes mellitus with renal complications          |
| 59. | 50429        | Non-insulin-dependent diabetes mellitus with ophthalm comps |
| 60. | 50527        | Type II diabetes mellitus with polyneuropathy               |
| 61. | 50609        | Pre-existing diabetes mellitus, non-insulin-dependent       |
| 62. | 50813        | Type II diabetes mellitus with mononeuropathy               |
| 63. | 51756        | Type 2 diabetes mellitus with ketoacidotic coma             |
| 64. | 52303        | Non-insulin-dependent diabetes mellitus with renal comps    |
| 65. | 53392        | Type II diabetes mellitus without complication              |
| 66. | 54899        | Type II diabetes mellitus with peripheral angiopathy        |
| 67. | 55075        | Type II diabetes mellitus with ulcer                        |
| 68. | 55842        | Non-insulin-dependent diabetes mellitus with neuro comps    |
| 69. | 56268        | Type II diabetes mellitus with hypoglycaemic coma           |
| 70. | 56803        | NIDDM with peripheral circulatory disorder                  |
| 71. | 57278        | Type II diabetes mellitus with renal complications          |
| 72. | 58604        | Type II diabetes mellitus with retinopathy                  |
| 73. | 59253        | Type 2 diabetes mellitus with arthropathy                   |
| 74. | 59365        | Non-insulin dependent diabetes mellitus with nephropathy    |
| 75. | 59725        | Type II diabetes mellitus with ophthalmic complications     |
| 76. | 60699        | Type 2 diabetes mellitus with peripheral angiopathy         |
| 77. | 60796        | Type II diabetes mellitus with persistent proteinuria       |
| 78. | 61071        | Type 2 diabetes mellitus with hypoglycaemic coma            |
| 79. | 62107        | Type II diabetes mellitus with gangrene                     |
| 80. | 62146        | Non-insulin-dependent diabetes mellitus with multiple comps |
| 81. | 62674        | Type 2 diabetes mellitus with mononeuropathy                |
| 82. | 63690        | Type 2 diabetes mellitus with gastroparesis                 |
| 83. | 64571        | Type II diabetes mellitus with nephropathy                  |
| 84. | 64668        | Insulin treated Type II diabetes mellitus                   |
| 85. | 65267        | Type 2 diabetes mellitus with multiple complications        |
| 86. | 65704        | Type 2 diabetes mellitus with ulcer                         |
| 87. | 66965        | Type 2 diabetes mellitus with neuropathic arthropathy       |
| 88. | 67905        | Type II diabetes mellitus with neurological complications   |
| 89. | 69278        | Non-insulin depend diabetes mellitus with diabetic cataract |
| 90. | 70316        | Type 2 diabetes mellitus with ophthalmic complications      |
| 91. | 72320        | Non-insulin dependent diabetes mellitus with mononeuropathy |
| 92. | 83532        | Diabetes type 2 review                                      |
| 93. | 85991        | Type II diabetes mellitus with persistent microalbuminuria  |
| 94. | 91646        | Type II diabetes mellitus with ulcer                        |
| 95. | 93727        | Type II diabetes mellitus with diabetic cataract            |
| 96. | 95351        | Type II diabetes mellitus with mononeuropathy               |
| 97. | 98616        | Type II diabetes mellitus with neurological complications   |
| 98. | 98723        | Type II diabetes mellitus with hypoglycaemic coma           |
| 99. | 100964       | Type II diabetes mellitus with ophthalmic complications     |

|      | Medical code | Read term                                                   |
|------|--------------|-------------------------------------------------------------|
| 100. | 101801       | Type II diabetic dietary review                             |
| 101. | 102201       | Type II diabetes mellitus with nephropathy                  |
| 102. | 102611       | Type 2 diabetic dietary review                              |
| 103. | 103902       | Type II diabetes mellitus with arthropathy                  |
| 104. | 104323       | Type II diabetes mellitus with gangrene                     |
| 105. | 104639       | Type II diabetes mellitus with peripheral angiopathy        |
| 106. | 105784       | Type 2 diabetes mellitus without complication               |
| 107. | 106061       | Type II diabetes mellitus with ketoacidotic coma            |
| 108. | 106528       | Type II diabetes mellitus with ketoacidosis                 |
| 109. | 107701       | Hyperosmolar non-ketotic state in type II diabetes mellitus |
| 110. | 107824       | Type II diabetes mellitus in remission                      |
| 111. | 108005       | Type 2 diabetes mellitus with multiple complications        |
| 112. | 109103       | Type II diabetes mellitus without complication              |
| 113. | 109197       | Type II diabetes mellitus with neuropathic arthropathy      |
| 114. | 109865       | Type 2 diabetes mellitus with polyneuropathy                |
| 115. | 111798       | Type II diabetes mellitus with exudative maculopathy        |

**Table S2 Exclusion type 1 diabetes codes**

|     | Medical code | Read term                                                    |
|-----|--------------|--------------------------------------------------------------|
| 1.  | 1038         | Insulin dependent diabetes mellitus                          |
| 2.  | 1549         | Type 1 diabetes mellitus                                     |
| 3.  | 1647         | Insulin dependent diabetes mellitus                          |
| 4.  | 6509         | Insulin dependent diabetes mellitus with retinopathy         |
| 5.  | 6791         | Insulin dependent diabetes mellitus - poor control           |
| 6.  | 10418        | Type 1 diabetes mellitus with nephropathy                    |
| 7.  | 10692        | Type 1 diabetes mellitus with ketoacidosis                   |
| 8.  | 12455        | Type I diabetes mellitus                                     |
| 9.  | 17545        | Type I diabetes mellitus with diabetic cataract              |
| 10. | 17858        | Type 1 diabetes mellitus                                     |
| 11. | 18230        | Type 1 diabetes mellitus with neuropathic arthropathy        |
| 12. | 18387        | Type 1 diabetes mellitus with retinopathy                    |
| 13. | 18505        | IDDM-Insulin dependent diabetes mellitus                     |
| 14. | 18642        | Type 1 diabetes mellitus with arthropathy                    |
| 15. | 18683        | Type 1 diabetes mellitus with ulcer                          |
| 16. | 21983        | Type 1 diabetes mellitus with renal complications            |
| 17. | 22871        | Type 1 diabetes mellitus with exudative maculopathy          |
| 18. | 24423        | Type I diabetes mellitus                                     |
| 19. | 24490        | Diabetes mellitus, juvenile type, no mention of complication |
| 20. | 24694        | Insulin dependent diabetes mellitus with mononeuropathy      |
| 21. | 26855        | Unstable insulin dependent diabetes mellitus                 |
| 22. | 30294        | Type 1 diabetes mellitus with persistent microalbuminuria    |
| 23. | 30323        | Type 1 diabetes mellitus with persistent proteinuria         |
| 24. | 31310        | Insulin dependent diabetes maturity onset                    |
| 25. | 32359        | Perceived control of insulin-dependent diabetes              |
| 26. | 35288        | Type 1 diabetes mellitus - poor control                      |
| 27. | 38161        | Type I diabetes mellitus with retinopathy                    |
| 28. | 39070        | Type 1 diabetes mellitus with hypoglycaemic coma             |
| 29. | 39809        | Insulin dependent diab mell with neuropathic arthropathy     |
| 30. | 40023        | Diabetes mellitus, juvenile type, with hyperosmolar coma     |
| 31. | 40682        | Type 1 diabetes mellitus maturity onset                      |
| 32. | 40837        | Type 1 diabetes mellitus with ketoacidotic coma              |
| 33. | 41049        | Type 1 diabetes mellitus with retinopathy                    |
| 34. | 41716        | Insulin dependent diabetes mellitus with polyneuropathy      |
| 35. | 42567        | Diabetes mellitus, juvenile type, with ketoacidotic coma     |
| 36. | 42729        | Type I diabetes mellitus with hypoglycaemic coma             |
| 37. | 42831        | Type 1 diabetes mellitus with neurological complications     |
| 38. | 43921        | Unstable type 1 diabetes mellitus                            |
| 39. | 44260        | Insulin dependent diabetes mellitus with diabetic cataract   |
| 40. | 44440        | Insulin dependent diabetes mellitus with hypoglycaemic coma  |
| 41. | 44443        | Insulin dependent diabetes mellitus with ulcer               |
| 42. | 45276        | Insulin dependent diabetes mellitus with multiple complicat  |
| 43. | 45914        | Type 1 diabetes mellitus - poor control                      |
| 44. | 46301        | Type 1 diabetes mellitus with polyneuropathy                 |
| 45. | 46850        | Type I diabetes mellitus - poor control                      |
| 46. | 46963        | Insulin-dependent diabetes mellitus with renal complications |
| 47. | 47582        | Type 1 diabetes mellitus with renal complications            |

|      | Medical code | Read term                                                    |
|------|--------------|--------------------------------------------------------------|
| 48.  | 47649        | Type 1 diabetes mellitus with ophthalmic complications       |
| 49.  | 47650        | Type 1 diabetes mellitus with multiple complications         |
| 50.  | 49146        | Type I diabetes mellitus with neurological complications     |
| 51.  | 49276        | Insulin-dependent diabetes mellitus with ophthalmic comps    |
| 52.  | 49554        | Type 1 diabetes mellitus with diabetic cataract              |
| 53.  | 49949        | Unstable type I diabetes mellitus                            |
| 54.  | 50960        | Pre-existing diabetes mellitus, insulin-dependent            |
| 55.  | 51261        | Insulin dependent diabetes mellitus                          |
| 56.  | 51957        | Type I diabetes mellitus with ulcer                          |
| 57.  | 52104        | Insulin dependent diabetes mellitus with multiple complicatn |
| 58.  | 52283        | Insulin-dependent diabetes mellitus with neurological comps  |
| 59.  | 53200        | Diabetes mellitus, juvenile type, with ketoacidosis          |
| 60.  | 54008        | Type 1 diabetes mellitus with neuropathic arthropathy        |
| 61.  | 54600        | Unstable insulin dependent diabetes mellitus                 |
| 62.  | 55239        | Type 1 diabetes mellitus with gastroparesis                  |
| 63.  | 56448        | Insulin-dependent diabetes without complication              |
| 64.  | 57621        | Insulin dependent diabetes mellitus with nephropathy         |
| 65.  | 60107        | Unstable type I diabetes mellitus                            |
| 66.  | 60208        | Type I diabetes mellitus with neuropathic arthropathy        |
| 67.  | 60499        | Insulin dependent diabetes mellitus with gangrene            |
| 68.  | 61344        | Type I diabetes mellitus with renal complications            |
| 69.  | 61829        | Type 1 diabetes mellitus with neurological complications     |
| 70.  | 62209        | Type I diabetes mellitus with ketoacidosis                   |
| 71.  | 62352        | Type I diabetes mellitus with arthropathy                    |
| 72.  | 62613        | Type I diabetes mellitus without complication                |
| 73.  | 63017        | Type I diabetes mellitus maturity onset                      |
| 74.  | 64446        | Insulin dependent diab mell with peripheral angiopathy       |
| 75.  | 65616        | Insulin dependent diabetes mellitus with arthropathy         |
| 76.  | 66145        | Type I diabetes mellitus with ketoacidotic coma              |
| 77.  | 66872        | Type I diabetes mellitus with nephropathy                    |
| 78.  | 68105        | Type 1 diabetes mellitus with mononeuropathy                 |
| 79.  | 68390        | Type 1 diabetes mellitus with ulcer                          |
| 80.  | 68792        | Diabetes mellitus, juvenile type, + unspecified complication |
| 81.  | 69043        | Dietary advice for type I diabetes                           |
| 82.  | 69676        | Type 1 diabetes mellitus without complication                |
| 83.  | 69748        | Diabetes mellitus, juvenile type, + ophthalmic manifestation |
| 84.  | 69993        | Type 1 diabetes mellitus with gangrene                       |
| 85.  | 70766        | Type 1 diabetes mellitus with hypoglycaemic coma             |
| 86.  | 72702        | Insulin dependent diabetes mellitus - poor control           |
| 87.  | 85660        | Diabetes type 1 review                                       |
| 88.  | 91942        | Type I diabetes mellitus with multiple complications         |
| 89.  | 91943        | Type I diabetes mellitus with polyneuropathy                 |
| 90.  | 93468        | Type 1 diabetes mellitus with peripheral angiopathy          |
| 91.  | 93875        | Insulin dependent diabetes mellitus with retinopathy         |
| 92.  | 93878        | Type I diabetes mellitus with ulcer                          |
| 93.  | 93922        | Diabetes mellitus, juvenile type, with renal manifestation   |
| 94.  | 95343        | Type I diabetes mellitus with retinopathy                    |
| 95.  | 95992        | Type I diabetes mellitus without complication                |
| 96.  | 96235        | Type I diabetes mellitus maturity onset                      |
| 97.  | 97446        | Type 1 diabetes mellitus maturity onset                      |
| 98.  | 97474        | Unstable type 1 diabetes mellitus                            |
| 99.  | 97849        | Insulin dependent diabetes maturity onset                    |
| 100. | 97894        | Type I diabetes mellitus with exudative maculopathy          |

|      | Medical code | Read term                                                    |
|------|--------------|--------------------------------------------------------------|
| 101. | 98071        | Insulin-dependent diabetes mellitus with ophthalmic comps    |
| 102. | 98392        | Maturity onset diabetes in youth type 1                      |
| 103. | 98704        | Insulin dependent diabetes mellitus with ulcer               |
| 104. | 99231        | Type I diabetes mellitus with mononeuropathy                 |
| 105. | 99311        | Type I diabetes mellitus with ophthalmic complications       |
| 106. | 99716        | Insulin dependent diabetes mellitus with hypoglycaemic coma  |
| 107. | 99719        | Insulin-dependent diabetes without complication              |
| 108. | 100770       | Insulin dependent diabetes mellitus with diabetic cataract   |
| 109. | 101311       | Insulin dependent diabetes mellitus with polyneuropathy      |
| 110. | 101735       | Insulin-dependent diabetes mellitus with neurological comps  |
| 111. | 102112       | Type I diabetes mellitus with gangrene                       |
| 112. | 102163       | Insulin dependent diabetes mellitus with nephropathy         |
| 113. | 102620       | Type I diabetes mellitus with persistent microalbuminuria    |
| 114. | 102704       | Type I diabetic dietary review                               |
| 115. | 102740       | Type 1 diabetes mellitus with ophthalmic complications       |
| 116. | 102946       | Insulin-dependent diabetes mellitus with renal complications |
| 117. | 104453       | Type 1 diabetic dietary review                               |
| 118. | 105337       | Type I diabetes mellitus - poor control                      |
| 119. | 108007       | Type I diabetes mellitus with multiple complications         |
| 120. | 108360       | Type I diabetes mellitus in remission                        |
| 121. | 108724       | Type I diabetes mellitus with gastroparesis                  |
| 122. | 109051       | Insulin dependent diabetes mellitus with gangrene            |
| 123. | 109628       | Type 1 diabetes mellitus in remission                        |
| 124. | 109837       | Type I diabetes mellitus with renal complications            |
| 125. | 109878       | Diet advice for insulin-dependent diabetes                   |
| 126. | 110400       | Type 1 diabetes mellitus with diabetic cataract              |
| 127. | 111106       | Type 1 diabetes mellitus without complication                |

Figure S1 Severity hierarchy of cardiovascular disease domains (cardiac muscle- myocardium and pericardium).

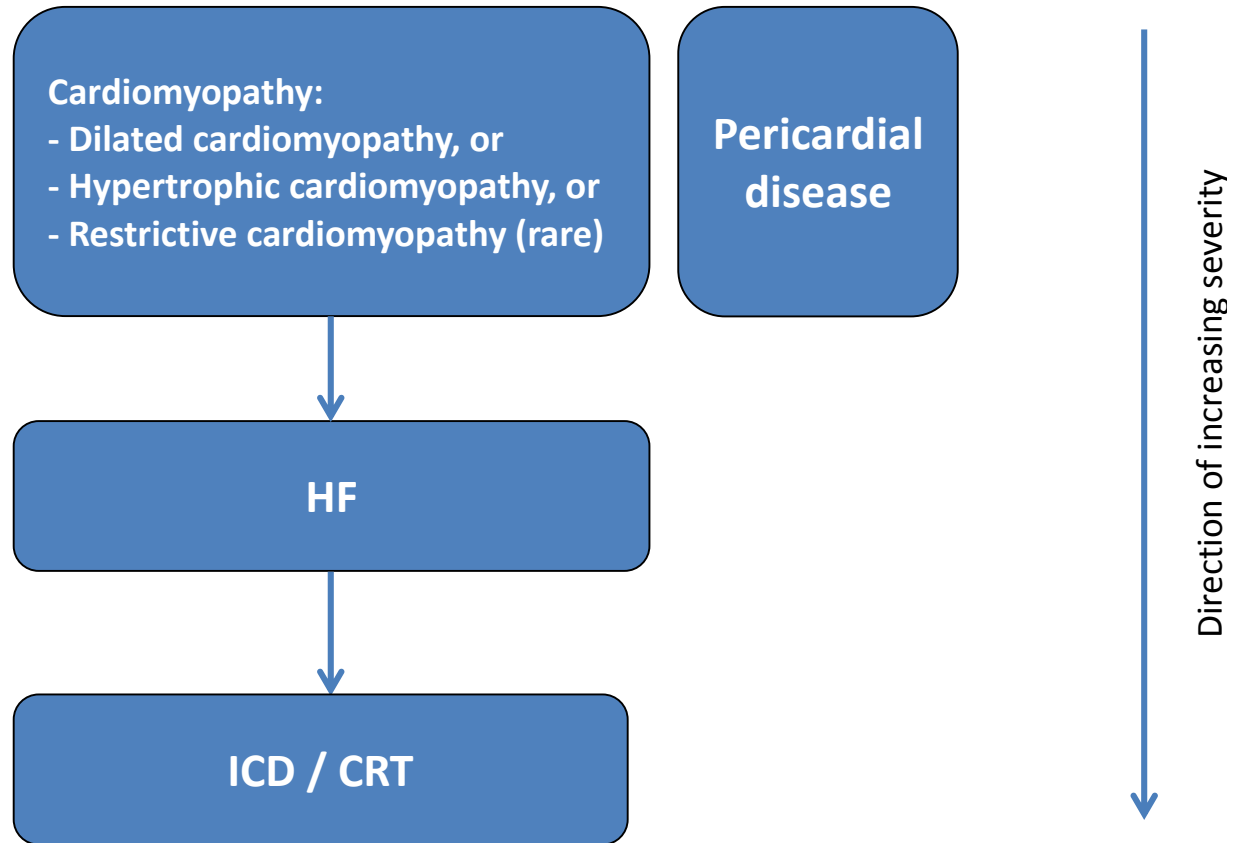

Figure S2 Severity hierarchy of cardiovascular disease domains (Heart valve diseases)

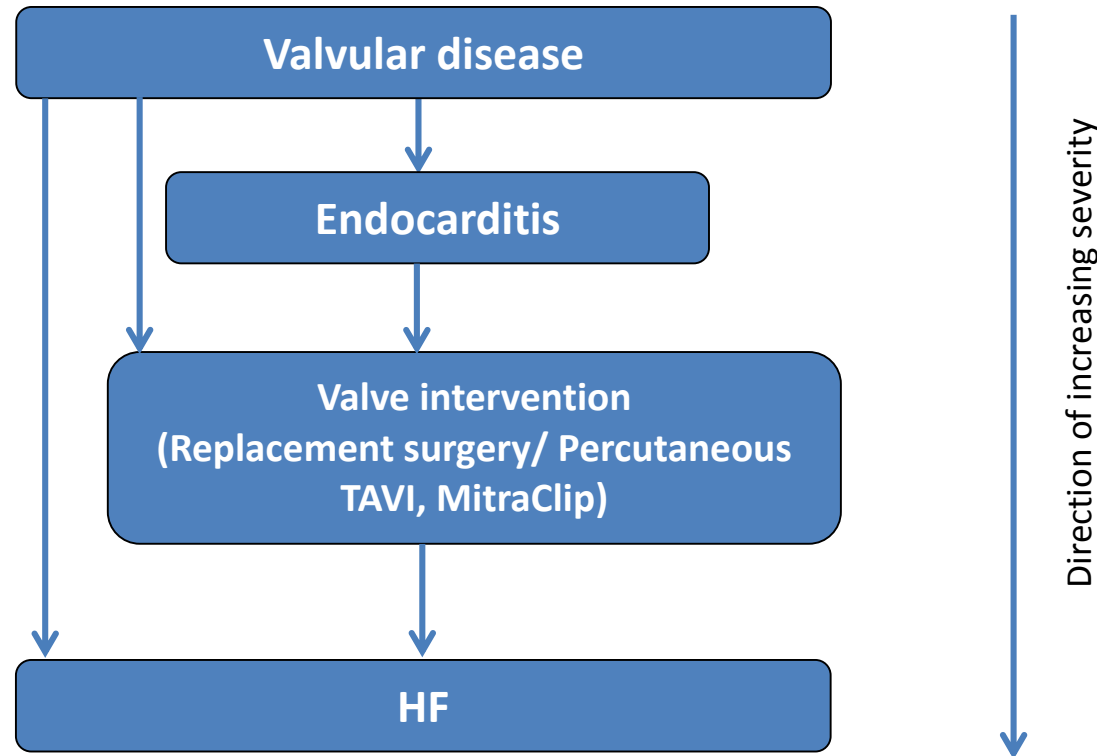



**Table S3 Factors used in previous studies to define severity of diabetes**

| Study ID                                 | Factors used to define diabetes severity / Outcome(s)                                                                                                                                                                                                                                                                                                                                                                           | Severity scale/ levels                                                                                                                                                                                                                                                                                                                                                                                                                                                                                                                                                                                                                                              | Validation study                                                                                                                     |
|------------------------------------------|---------------------------------------------------------------------------------------------------------------------------------------------------------------------------------------------------------------------------------------------------------------------------------------------------------------------------------------------------------------------------------------------------------------------------------|---------------------------------------------------------------------------------------------------------------------------------------------------------------------------------------------------------------------------------------------------------------------------------------------------------------------------------------------------------------------------------------------------------------------------------------------------------------------------------------------------------------------------------------------------------------------------------------------------------------------------------------------------------------------|--------------------------------------------------------------------------------------------------------------------------------------|
| Gini et al. (2016) <sup>(1)</sup>        | <ul style="list-style-type: none"> <li>• Indication for insulin therapy</li> <li>• The presence of diabetes-related complications</li> </ul> <p><b>Outcomes:</b><br/>Assessing the positive predictive value (PPV) for the presence/absence of type 2 diabetes against the GP's response to the questionnaire and measure the agreement on the severity level.</p>                                                              | <p>Four levels of T2DM severity:</p> <ul style="list-style-type: none"> <li>• <b>Level 1:</b> Clinical definition of the disease, no indication for Insulin therapy and no complications listed in Level 3.</li> <li>• <b>Level 2:</b> as in Level 1 except insulin is indicated.</li> <li>• <b>Level 3:</b> as in Level 1 except with one of the following complications: (1) arterial stenosis, angina, MI, TIA, ischaemic stroke, intermittent claudication, diabetic foot ulcer, lower limb amputation, (2) retinopathy, (3) incipient or overt diabetic nephropathy/ dialysis.</li> <li>• <b>Level 4:</b> As in Level 3 except insulin is indicated</li> </ul> | A random sample of identified cases was validated by interviewing their self-selected general practitioners (GPs).                   |
| Grootenhuus et al. (1994) <sup>(2)</sup> | <p>Type 2 diabetes symptom severity items categorised over six clinical dimensions:</p> <ul style="list-style-type: none"> <li>• Hyperglycaemic</li> <li>• Hypoglycaemic</li> <li>• Psychological</li> <li>• Cardiovascular</li> <li>• Neuropathic</li> <li>• Ophthalmological</li> </ul> <p><b>Outcomes:</b><br/>To measure differences in symptom severity between patients and detect changes over time within patients.</p> | A 34-item patient-derived checklist used as a measure for type 2 diabetes symptom severity.                                                                                                                                                                                                                                                                                                                                                                                                                                                                                                                                                                         | The face and content validity of severity items and dimension structures were based on literature and experiences of diabetologists. |
| Young et al. (2008) <sup>(3)</sup>       | <p>From laboratory data and diabetes-related complications:</p> <ul style="list-style-type: none"> <li>• Retinopathy</li> <li>• Nephropathy</li> <li>• Neuropathy</li> <li>• Cerebrovascular</li> <li>• Cardiovascular</li> <li>• Peripheral vascular disease</li> <li>• Metabolic</li> </ul> <p><b>Outcomes:</b><br/>Risk of mortality, hospitalisation and healthcare utilisation.</p>                                        | Developed the Diabetes Complication Severity Index (DCSI) that is categorised to two or three levels (0=no abnormality; 1=some abnormality, 2=severe abnormality) depending on the severity of the complication. So if no abnormalities were present, the patient received no score, a 1 was added to the DCSI if patient had any complication classified as some abnormality and 2 was added if patient had any complication classified as severe abnormality.                                                                                                                                                                                                     | The study design was a validation sample                                                                                             |

## References

1. Gini R, Schuemie MJ, Mazzaglia G, Lapi F, Francesconi P, Pasqua A, et al. Automatic identification of type 2 diabetes, hypertension, ischaemic heart disease, heart failure and their levels of severity from Italian General Practitioners' electronic medical records: a validation study. *BMJ open*. 2016;6(12):e012413. Epub 2016/12/13.
2. Grootenhuis PA, Snoek FJ, Heine RJ, Bouter LM. Development of a type 2 diabetes symptom checklist: a measure of symptom severity. *Diabetic medicine : a journal of the British Diabetic Association*. 1994;11(3):253-61. Epub 1994/04/01.
3. Young BA, Lin E, Von Korff M, Simon G, Ciechanowski P, Ludman EJ, et al. Diabetes complications severity index and risk of mortality, hospitalization, and healthcare utilization. *Am J Manag Care*. 2008;14(1):15-24.
